# Supplementary material for: An Overview of Rickets in Children
Source: PubMed Central journal article supplement — Kidney Int Rep. 2020 Apr 11;5(7):980–90. doi: 10.1016/j.ekir.2020.03.025 (PMC7335963; doi:10.1016/j.ekir.2020.03.025), 2020-04-11
Supplement: mmc1.pdf [file mmc1.pdf]

**Supplemental Table 1: Animal models of different types of rickets** 56, 70-77

| Strain Name                         | Alternative name                                         | Description                                                                                           | Phenotype                                                                                                  | Source                 |
|-------------------------------------|----------------------------------------------------------|-------------------------------------------------------------------------------------------------------|------------------------------------------------------------------------------------------------------------|------------------------|
| Phex <sup>Hyp</sup>                 | B6.Cg- <i>Phex<sup>Hyp</sup>/J</i>                       | X-linked semi-dominant mutation It is allelic with the gyro mutation                                  | Defects in phosphate metabolism. Reduced body size and skeletal abnormalities shortened hindlimbs and tail | Lorenz-Depiereux, 2004 |
| Vitamin D-dependent rickets type II | VDDR II                                                  | Targeted ablation of the second zinc finger of the VDR DNA-binding domain                             | Hypocalcemia, hyperparathyroidism, rickets, osteomalacia, Alopecia                                         | Yan Chun Li, 1997      |
| Pseudovitamin D-Deficiency Rickets  | PDDR                                                     | Targeted Inactivation of the 25-Hydroxyvitamin D <sub>3</sub> -1 $\alpha$ -Hydroxylase Gene (CYP27B1) | Hypocalcemic, hypophosphatemic, hyperparathyroidism.                                                       | Olivier Dardenne 2001  |
| Hypophosphatemic Rickets            | FGF-23 transgenic mice                                   |                                                                                                       | hypophosphatemia Increased renal phosphate wasting, low serum 1,25-dihydroxyvitamin D level                | Takashi Shimada 2004   |
| Inherited Rickets                   | Nonsense Mutation in the <i>DMP1</i> in Corriedale Sheep |                                                                                                       | Decreased bone mass with low serum calcium and phosphate                                                   | Xia Zhao 2011          |
| Rickets                             | Dmp1 KO                                                  |                                                                                                       | Decreased growth                                                                                           | Feng et al.,           |

|                                             |                                        |  |                                                                                                                     |                           |
|---------------------------------------------|----------------------------------------|--|---------------------------------------------------------------------------------------------------------------------|---------------------------|
|                                             | mice                                   |  | rate, thoracic lordosis and angular limb deformities with low serum calcium and phosphate                           | 2006                      |
| Rickets                                     | Cation-Sensing Receptor-Deficient Mice |  | Widened zone of hypertrophic chondrocytes, impaired growth plate calcification, excessive osteoid                   | Sanford C. Garner<br>2001 |
| Pseudo vitamin D-deficiency rickets, type I | Hannover Pig                           |  | Devoid renal 25-hydroxyvitamin D <sub>3</sub> -1 $\alpha$ -hydroxylase and -24-hydroxylase activities               | Reinhard Kaune<br>1987    |
| Rickets/osteomalacia, vitamin D toxicity    | Vitamin D Binding protein null mice    |  | Development of secondary hyperparathyroidism and the accompanying bone changes associated with vitamin D deficiency | Safadi, 1999              |
